# Supplementary material
Source: PubMed Central journal article supplement (PMC3866553)
Supplement: supp_btt571_appendixA.pdf [file supp_btt571_appendixA.pdf]

Table 1. Key symbols and notations used in our algorithm description.

| Symbol                                                     | Meaning                                                                                                                                                   |
|------------------------------------------------------------|-----------------------------------------------------------------------------------------------------------------------------------------------------------|
| $wp, wp_k$                                                 | An arbitrary webpage without or with a reference index number                                                                                             |
| $\Omega$                                                   | A certain user information need                                                                                                                           |
| $\Phi$                                                     | A predictive model for webpage utility scores                                                                                                             |
| $\hat{\Phi}(wp, \Omega)$                                   | The predicted utility score for $wp$ according to $\Omega$ using text features extracted from the full text of $wp$ after $wp$ is downloaded              |
| $T_1(wp)$                                                  | Content words or word phrases in the main body text of $wp$                                                                                               |
| $T_2(wp)$                                                  | Content words or word phrases in the heading and subtitle text of $wp$                                                                                    |
| $T_3(wp)$                                                  | Content words or word phrases in the anchor text embedded in $wp$                                                                                         |
| $kw_{i,j}(wp)$                                             | Key words or phrases extracted from the text set $T_i(wp)$ ( $i = 1, 2, 3$ ) where $j$ is an entry index number                                           |
| $n_i$                                                      | The number of distinct keywords extracted by the RAKE algorithm from the text set $T_i(wp)$                                                               |
| $kw_{i,j}^k$                                               | A short notation of $kw_{i,j}(wp_k)$                                                                                                                      |
| <b>wp</b>                                                  | A selected collection of webpages where every webpage's relevance to a given $\Omega$ is manually rated                                                   |
| <b>kw</b>                                                  | All detected keywords from webpages in <b>wp</b>                                                                                                          |
| $\hat{\Phi}(wp_k, \Omega)$                                 | A human rated utility score for the webpage $wp_k$ with respect to a given information need $\Omega$                                                      |
| <b>kw</b>                                                  | A filtered version of the keyword set <b>kw</b> where infrequent keywords are removed                                                                     |
| $\tau$                                                     | A lower threshold for human labeled webpage utility scores                                                                                                |
| $\psi(kw_{i,j}^k, \Omega, \tau, \mathbf{wp})$              | The keyword $kw_{i,j}^k$ 's odd ratio with respect to the labeled training set <b>wp</b> and the information need $\Omega$                                |
| $C_1$                                                      | A straightforward construction of a web crawler                                                                                                           |
| $C_2$                                                      | Our proposed adaptive user-oriented web crawler                                                                                                           |
| $\{Q_1, Q_2, \dots, Q_n\}$                                 | A series of seed queries to obtain initial search result webpages for a web crawling session                                                              |
| $u_i$                                                      | A search result URL link                                                                                                                                  |
| <b>u</b>                                                   | A list of search result URL links                                                                                                                         |
| $\Delta(\mathbf{u})$                                       | A prioritized crawling list for the URL list <b>u</b>                                                                                                     |
| $\delta()$                                                 | A webpage ranking function                                                                                                                                |
| $u_{\delta(i)}$                                            | The URL of the $i$ -th webpage for the crawler to visit in a given crawling session                                                                       |
| $\mathbf{F}(u_i)$                                          | Text features extracted from the webpage pointed to by the link $u_i$ .                                                                                   |
| $\Upsilon(wp(u_i), \Omega, t_j)$                           | The predicted utility score for the webpage $wp(u_i)$ according to the information need $\Omega$ using all available information at the time moment $t_j$ |
| $t$                                                        | A given time moment                                                                                                                                       |
| $T(u_i)$                                                   | The time cost to access the webpage pointed to by the URL link $u_i$                                                                                      |
| $[-\psi_k(wp(u_i), t_j), \psi_k(wp(u_i), t_j)]$            | $\Upsilon(wp(u_i), \Omega, t_j)$ 's relative prediction error interval                                                                                    |
| $\eta_k(wp(u_i), t_j)$                                     | Estimation confidence for the relative error interval of $[-\psi_k(wp(u_i), t_j), \psi_k(wp(u_i), t_j)]$                                                  |
| $t_x$                                                      | A certain amount of time permissible for a crawler                                                                                                        |
| $\mathcal{V}(t_0, t_x)$                                    | An optimal URL visitation trajectory for the crawling session starting at the time $t_0$ and ends at $t_x$                                                |
| $\{u_{\delta(1)}, u_{\delta(2)}, \dots, u_{\delta(n_x)}\}$ | URLs of webpages crawled following a certain trajectory $\mathcal{V}(t_x)$ and within the time duration $[t_0, t_x]$                                      |
| $\mathcal{U}(t_i)$                                         | The snapshot of the pool of candidate URLs awaiting to be crawled at the time moment of $t_i$                                                             |
| $t_0$                                                      | The starting time for a crawling session                                                                                                                  |
| $\mathcal{U}(t_0)$                                         | The pool of seed webpage URLs for launching the crawler                                                                                                   |
| $\mathcal{G}(t_0, t_x, \mathcal{V}(t_0, t_x))$             | A theoretical objective function for optimal crawling trajectory planning                                                                                 |
| $\hat{\mathcal{G}}(t_0, t_x, \mathcal{V}(t_0, t_x))$       | A practical objective function for optimal crawling trajectory planning that can be computed on-the-fly                                                   |
| $p_i(t_z)$                                                 | The probability that from a candidate URL pool $\mathcal{U}(t_z)$ a link $u_i$ is randomly selected for the crawler to visit in the next crawling step    |
| $\{wp_i^{\text{good}}\}$                                   | A set of "good" exemplary search result webpages manually identified by a human searcher                                                                  |
| $\{wp_i^{\text{bad}}\}$                                    | A set of "bad" exemplary search result webpages manually identified by a human searcher                                                                   |
